# Supplementary material for: Dual-outward contraction-induced construction of 2D hollow carbon superstructures
Source: Royal Society of Chemistry journal article supplement (doi:10.1039/d3cc06156f), 2024-01-01
Supplement: d3cc06156f1.pdf [file d3cc06156f1.pdf]

1  
2  
3  
4  
5  
6  
7  
8  
9  
10  
11  
12

## Supporting Information

### **Dual-outward contraction induced construction of 2D hollow carbon superstructures**

Yaqi Zhang,<sup>a</sup> Jiali Lou,<sup>a</sup> Jiamin Wei,<sup>\*a</sup> Yajing Zhou,<sup>a</sup> Haifeng Wang,<sup>b</sup> Liangbiao Wang,<sup>a</sup> Qing Wang<sup>c</sup>,  
Xiaopeng Li <sup>\*b</sup> and Xiaokai Song <sup>\*a</sup>

<sup>a</sup> *Institute of Advanced Functional Materials for Energy, School of Chemistry and Chemical Engineering, Jiangsu University of Technology, Changzhou 213001, China.*

<sup>b</sup> *Faculty of Science and Engineering, Waseda University, 3-4-1 Okubo, Shinjuku, Tokyo 169-8555, Japan.*

<sup>c</sup> *Jiangsu Key Laboratory of Advanced Catalytic Materials and Technology, Changzhou University, Changzhou 213164, China.*

## 13 1. Experimental Procedures

### 14 1.1 Chemicals and materials

15 2-methylimidazole (98%) and Nafion (5 wt. % in lower aliphatic alcohols and water, contains 15-20% water; Nafion  
16 1100EW) were purchased from Energy Chemical Co., Ltd. and Sigma-Aldrich, respectively. Other reagents and  
17 solvents were purchased from Sinopharm Co. Ltd. and used without further purification. Deionized (DI) water with  
18 resistivity higher than  $18 \text{ M}\Omega \text{ cm}^{-1}$  was used during the experiments.

### 19 1.2 Synthesis of MOF nanoparticle and derived superstructure

20 **Truncated rhombic dodecahedral ZIF-8 (TR-Z8).** TR-Z8 was prepared by a reported method.<sup>[1]</sup> In brief, a 25 mL  
21 aqueous solution of  $\text{Zn}(\text{CH}_3\text{COO})_2 \cdot 2\text{H}_2\text{O}$  (1.50 g, 6.8 mmol) was prepared and added to a 25 mL aqueous solution  
22 containing 2-methylimidazole (5.60 g, 68 mmol) and cetyltrimethylammonium bromide (CTAB) (5.0 mg, 0.014  
23 mmol), followed by gentle stirring for 1 min. After allowing the mixture to stand undisturbed at room temperature  
24 for 2 h, the resulting crystals were collected via centrifugation and washed with water before proceeding to the next  
25 step in the synthesis process. The yield of TR-Z8 was determined based on the weight of vacuum-dried sample and  
26 used for preparing a colloidal solution with desired concentration in subsequent experiments.

27  **$\text{Co}^{2+}$ /ZIF-8 superstructures ( $\text{Co}^{2+}$ /ZIF-8-x, x represents the dosage of  $\text{Co}^{2+}$ ).**  $\text{Co}^{2+}$ /ZIF-8-10 hybrid  
28 superstructure was prepared using an ice-templating assisted self-assembly strategy. Briefly, a stable colloidal  
29 solution was obtained by dispersing 300 mg of TR-Z8 nanoparticles and 10 mg of  $\text{Co}(\text{NO}_3)_2 \cdot 6\text{H}_2\text{O}$  in 30 mL of  
30 deionized water, followed by ultrasonication for 30 min. Subsequently, the colloid solution was transferred into a  
31 disposable paper cup and slowly immersed into liquid nitrogen for 5 min to achieve complete freezing. After freeze-  
32 drying for 24 h using a freeze-dryer, the  $\text{Co}^{2+}$ /ZIF-8-10 was obtained. Similarly, the  $\text{Co}^{2+}$ /ZIF-8-0,  $\text{Co}^{2+}$ /ZIF-8-5,  
33  $\text{Co}^{2+}$ /ZIF-8-15, and  $\text{Co}^{2+}$ /ZIF-8-30 were prepared using different amounts of  $\text{Co}(\text{NO}_3)_2 \cdot 6\text{H}_2\text{O}$  (0 mg, 5 mg, 15 mg  
34 and 30 mg, respectively) via this ice-templating assisted self-assembly approach.

### 35 1.3 Synthesis of carbon-based catalyst

36 **2D Hollow carbon-based nanoarchitectures (Co/HCS-x).** Co/HCS-x was prepared by a high-temperature  
37 pyrolysis process under inert atmosphere. Typically, a sample of 300 mg  $\text{Co}^{2+}$ /ZIF-8-x ( $\text{Co}^{2+}$ /ZIF-8-0,  $\text{Co}^{2+}$ /ZIF-8-  
38 5,  $\text{Co}^{2+}$ /ZIF-8-10,  $\text{Co}^{2+}$ /ZIF-8-15, and  $\text{Co}^{2+}$ /ZIF-8-30) were calcined in a tube furnace at  $900 \text{ }^\circ\text{C}$  under  $\text{N}_2$  atmosphere  
39 for 2 h with a temperature raising rate of  $3 \text{ }^\circ\text{C min}^{-1}$ . After natural cooling to room temperature, the catalysts were  
40 harvested and designated as Co/HCS-0, Co/HCS-5, Co/HCS-10, Co/HCS-15, and Co/HCS-30, respectively.

41

### 42 1.4 Materials characterization

43 The morphology and chemical composition of the samples were investigated by scanning electron microscopy  
44 (SEM, Hitachi S-3400N) and transmission electron microscopy (TEM, JEOL JEM-2100). The surface chemistry  
45 was analyzed by X-ray photoelectron spectroscopy (XPS) performed on a AXISULTRA DLD XPS System with  
46 MONO Al source and the binding energies were calibrated using the C 1s peak at 284.8 eV. The phase composition  
47 of samples was investigated by X-ray diffraction (XRD, PANalytical X' Pert Powder). The X-ray absorption  
48 spectroscopy (XAS) measurements were obtained on the Beam line BL14W1 and BL11B at the Shanghai  
49 Synchrotron Radiation Facility (SSRF).

50

51 **1.5 Electrochemical measurements**

52 The electrochemical measurements of ORR performance were tested on a CHI760E electrochemical  
 53 workstation in a conventional three-electrode system at room temperature. Catalyst ink was prepared by dispersing  
 54 5 mg of catalyst in a mixed solution containing 960  $\mu\text{L}$  of ethanol and 40  $\mu\text{L}$  of 5 wt% Nafion solution by  
 55 ultrasonication to obtain a homogeneous suspension. The electrolytes were composed of 0.1 M KOH. An Ag/AgCl  
 56 (3M KCl) electrode and a carbon rod were used as reference and counter electrode, respectively. The experiments  
 57 were conducted at room temperature and all of the potentials were calibrated to a reversible hydrogen electrode  
 58 (RHE). Generally, a RDE electrode with a diameter of  $\phi$  3 mm was used as the substrate for the working electrode.  
 59 An aliquot of 8  $\mu\text{L}$  of the catalyst ink was loaded onto the working electrode and dried under ambient conditions  
 60 with a mass loading of 0.57  $\text{mg cm}^{-2}$ . The electrolyte was purged by a specific gas for at least 30 min before the  
 61 measurements and the gas flow was maintained during the experiments. Cyclic voltammetry (CV) measurements  
 62 were conducted at a scan rate of 50  $\text{mV s}^{-1}$  and a rotation rate of 1600 rpm. To eliminate the influence of background  
 63 current, the linear scan voltammetry (LSV) measurements were recorded at a scan rate of 1  $\text{mV s}^{-1}$ . The double-  
 64 layer capacitance ( $C_{dl}$ ) was measured by a series of CV scanning in a non-Faradaic potential at various scan rates of  
 65 5-60  $\text{mV s}^{-1}$  in  $\text{N}_2$ -saturated 0.1 M KOH. The EIS test was carried out from  $10^5$  Hz to  $10^{-2}$  Hz and recorded at OCP  
 66 with an amplitude of 10 mV. The tolerance of the electrocatalysts to methanol poisoning was evaluated by injecting  
 67 5 mL of 3 M methanol into the electrolyte (150 mL) during the chronoamperometric measurements. For comparison,  
 68 Pt/C (20 wt% platinum, JM) was conducted on the same electrochemical tests.

69 To obtain the electron transfer number ( $n$ ) and hydrogen peroxide yield (%  $\text{H}_2\text{O}_2$ ), a rotating ring disk electrode  
 70 (RRDE) electrode (diameter:  $\phi$  4 mm) served as working electrode. The catalyst ink (12  $\mu\text{L}$ ) was dropped on the  
 71 RRDE electrode and then dried in the air. The %  $\text{H}_2\text{O}_2$  and  $n$  were calculated as the following equations:

$$72 \quad \% \text{H}_2\text{O}_2 = 200 \times \frac{I_R/N}{I_D + I_R/N} \quad (1)$$

$$73 \quad n = \frac{4}{1 + \frac{I_R}{I_D} \times N} \quad (2)$$

74 Where  $I_D$  and  $I_R$  are the disk and ring currents, respectively, and  $N$  is the collection efficiency (37%) of the ring  
 75 electrode.

76 The rotating speed of RDE was controlled from 400 to 2025 rpm. The Koutecký-Levich equation is:

$$77 \quad \frac{1}{j} = \frac{1}{j_L} + \frac{1}{j_K} = \frac{1}{B\omega^{1/2}} + \frac{1}{j_K} \quad (3)$$

$$78 \quad B = 0.62nFC_0(D_0)^{2/3} \nu^{-1/6} \quad (4)$$

$$79 \quad j_K = nFkC_0 \quad (5)$$

80 Where  $j$  is the measured current density,  $j_K$  and  $j_L$  are the kinetic- and diffusion-limiting current densities,  $\omega$  is the  
 81 angular velocity of the disk ( $\omega = 2\pi N$ ,  $N$  is the linear rotation speed),  $n$  represents the overall number of electrons  
 82 transferred in oxygen reduction,  $F$  is the Faraday constant ( $F = 96485 \text{ C mol}^{-1}$ ),  $C_0$  is the bulk concentration of  $\text{O}_2$   
 83 ( $1.2 \times 10^{-6} \text{ mol cm}^{-3}$ ),  $D_0$  is the diffusion coefficient of  $\text{O}_2$  in 0.1 M KOH electrolyte ( $1.9 \times 10^{-5} \text{ cm}^2 \text{ s}^{-1}$ ),  $\nu$  is the  
 84 kinematic viscosity of the electrolyte ( $0.01 \text{ cm}^2 \text{ s}^{-1}$ ), and  $k$  is the electron transfer rate constant.

85 **1.6 Zinc air batteries (ZABs) measurement**86 **1.6.1 Liquid ZABs**

87 Liquid ZABs were assembled in a typical two electrode configuration, in which a metallic zinc foil of purity

88 ~99.9% and an air electrode were used as anode and cathode, respectively. The air electrode used a carbon paper-  
89 based gas diffusion layer (TORAY-YLS 30T). The catalyst ink was drop casted onto the gas diffusion layer and dried  
90 by a hot air gun (temperature set at 80 °C). The catalyst loading was controlled to 1.0 mg cm<sup>-2</sup>. The electrolyte was  
91 aqueous 6 M KOH with 0.2 M zinc acetate, which was constantly purged with pure oxygen at a rate of 40 mL min<sup>-1</sup>.  
92 Prior to performance tests, the electrolyte was also purged with oxygen for 30 min in order to saturate electrolyte  
93 with oxygen. The open circuit voltage, discharging and charging polarization curves were recorded using the  
94 CHI760E electrochemical workstation. Rate performance of the assembled ZABs were evaluated by recording  
95 voltage profiles during galvanostatic discharge at various current densities from 5 to 50 mA cm<sup>-2</sup>. The constant  
96 current discharge-charge cycle curves and specific capacity of the batteries were carried out at room temperature  
97 using a battery test system (Land 3001A). The ZABs were discharged for 150 second and charged for 150 second at  
98 a current density of 10 mA cm<sup>-2</sup> in each galvanostatic cycle. The specific capacity and energy density were calculated  
99 according to the following equations:

$$\text{Specific capacity (mAh}\cdot\text{g}^{-1}) = I \times t / w_{\text{Zn}} \quad (6)$$

101 where  $I$  is the applied current (A),  $t$  is the serving time (s),  $V$  is the average discharge voltage (V), and  $w_{\text{Zn}}$  is  
102 the weight of zinc consumed (g).

### 103 1.6.2 Flexible ZABs

104 Flexible solid-state ZAB is consisted of air electrode, polyacrylic acid (PAA) film and zinc foil, which were  
105 served as air electrode, solid electrolyte and anode, respectively. The air electrode consists of a piece of nickel foam  
106 (NF) on the air-facing side as the current collector, a gas diffusion layer (GDL) in the middle, and a carbon cloth  
107 layer coated with catalyst (catalyst loading of 1.0 mg cm<sup>-2</sup>) on the electrolyte-facing side. To prepare PAA gel  
108 electrolyte: 1 g of *N,N*-methylene diacrylamide as a cross-linker and 5 g of acrylic acid were quickly poured into 20  
109 mL of DI water containing 18 g of KOH under continuous stirring, followed by dissolving 1.5 g of zinc acetate.  
110 After stirring for 2 h, K<sub>2</sub>S<sub>2</sub>O<sub>8</sub> aqueous solution (0.12 g dissolved in 20 mL of DI water) as the initiator was added to  
111 the aforementioned solution in the square mold and then shaken vigorously to form the PAA gel. The polarization  
112 curves were recorded via linear sweep voltammetry (LSV) at room temperature on a CHI 760E electrochemical  
113 working station. Both the current density and power density were normalized to the effective surface area of the air  
114 electrode. The ZABs were discharged for 150 second and charged for 150 second at a current density of 1 mA cm<sup>-2</sup>  
115 in each galvanostatic cycle.

116

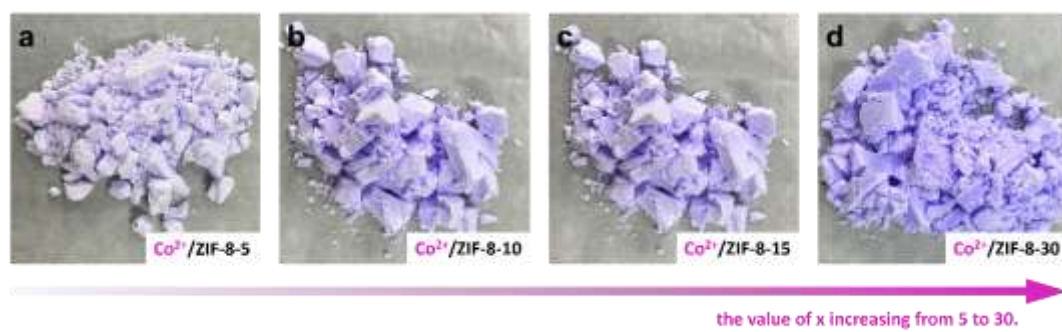

118

119 **Fig. S1** Digital photographs of ice-templating co-assembled Co<sup>2+</sup>/ZIF-8-x. (a) Co<sup>2+</sup>/ZIF-8-5, (b) Co<sup>2+</sup>/ZIF-8-10, (c)  
120 Co<sup>2+</sup>/ZIF-8-15, and (d) Co<sup>2+</sup>/ZIF-8-30.

121

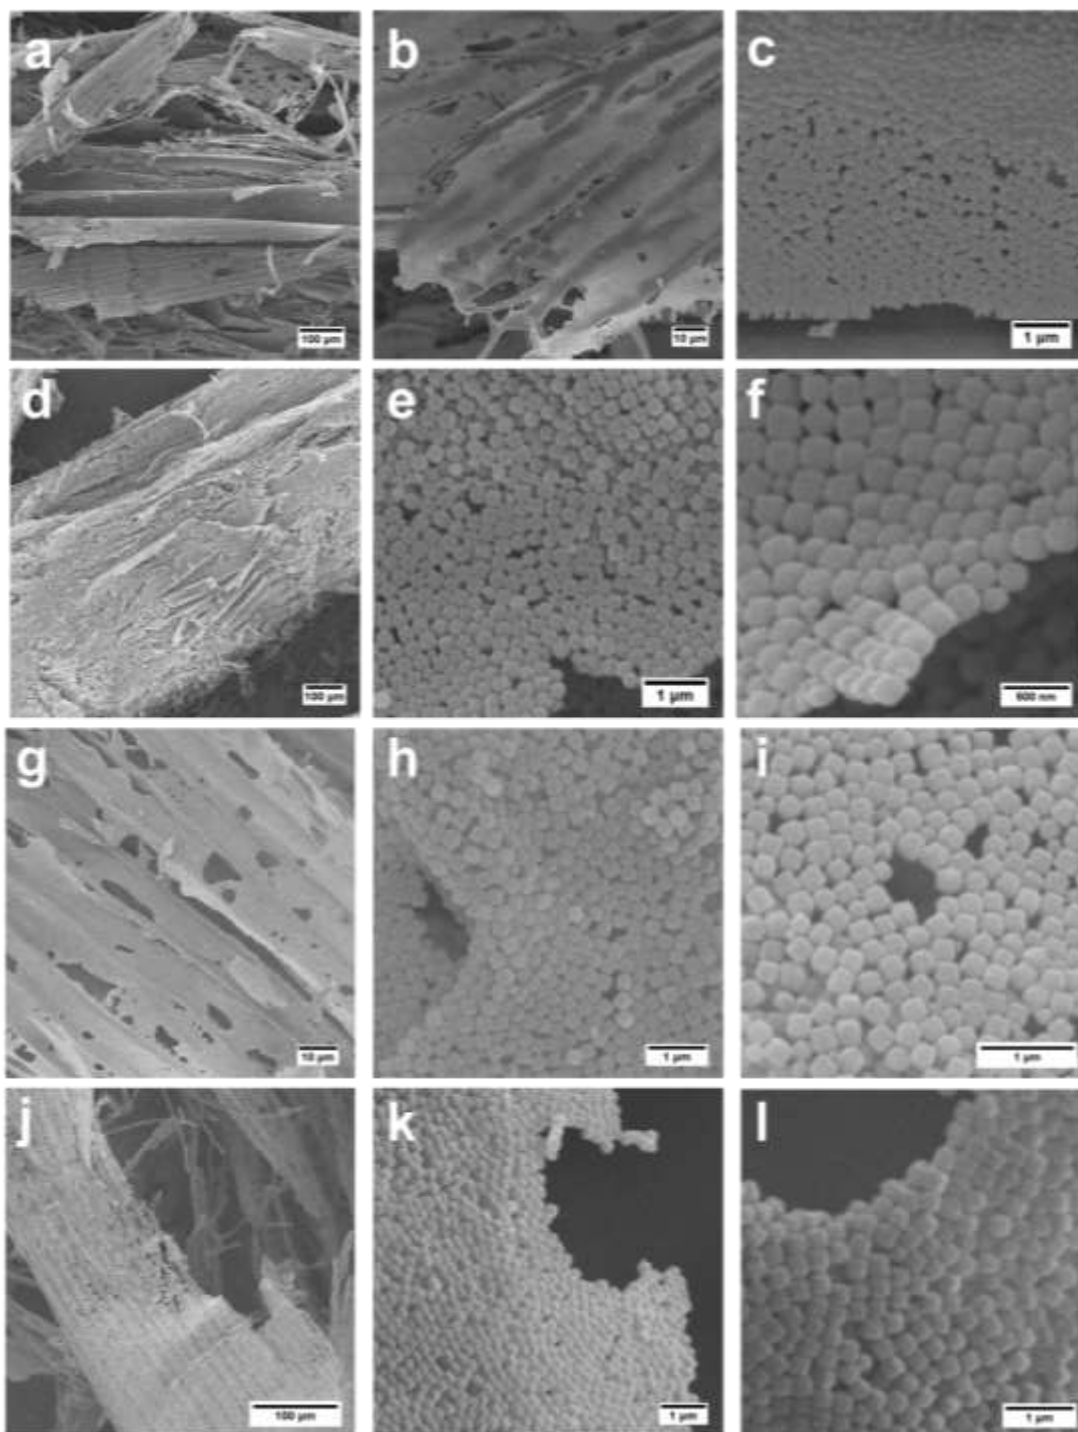

122

123 **Fig. S2** SEM images of  $\text{Co}^{2+}/\text{ZIF-8-x}$ . (a-c)  $\text{Co}^{2+}/\text{ZIF-8-5}$ , (d-f)  $\text{Co}^{2+}/\text{ZIF-8-10}$ , (g-i)  $\text{Co}^{2+}/\text{ZIF-8-15}$ , and (j-l)  
124  $\text{Co}^{2+}/\text{ZIF-8-30}$ .

125

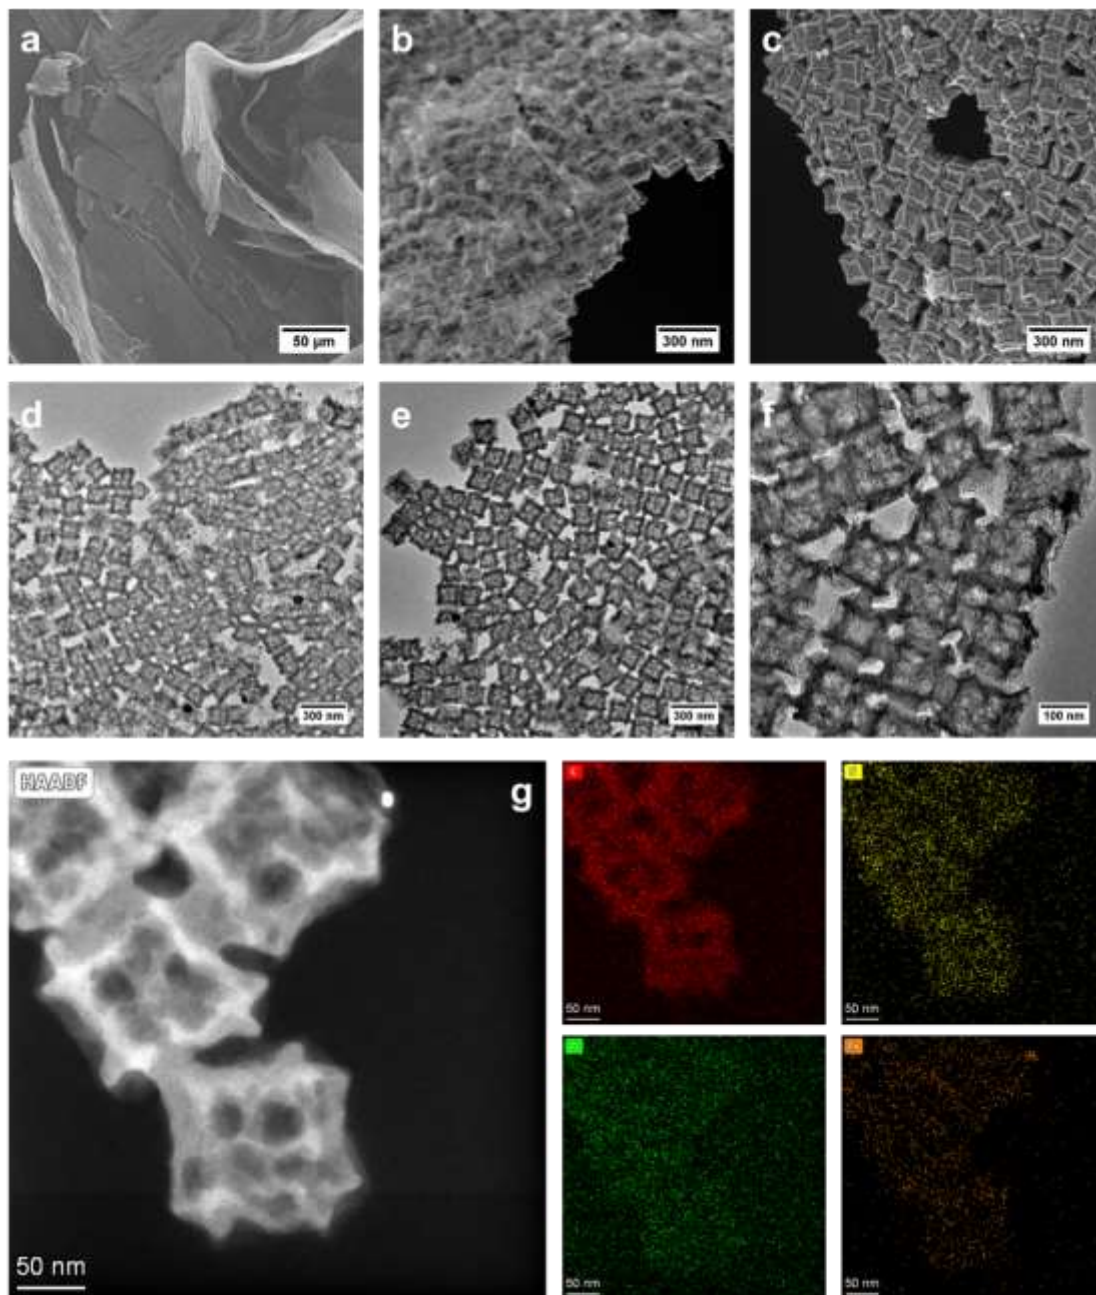

126

127 **Fig. S3** (a-c) SEM images, (d-f) TEM images, and (g) scanning TEM (STEM) images and elemental mapping images  
 128 of 2D Co/HCS-10.

129

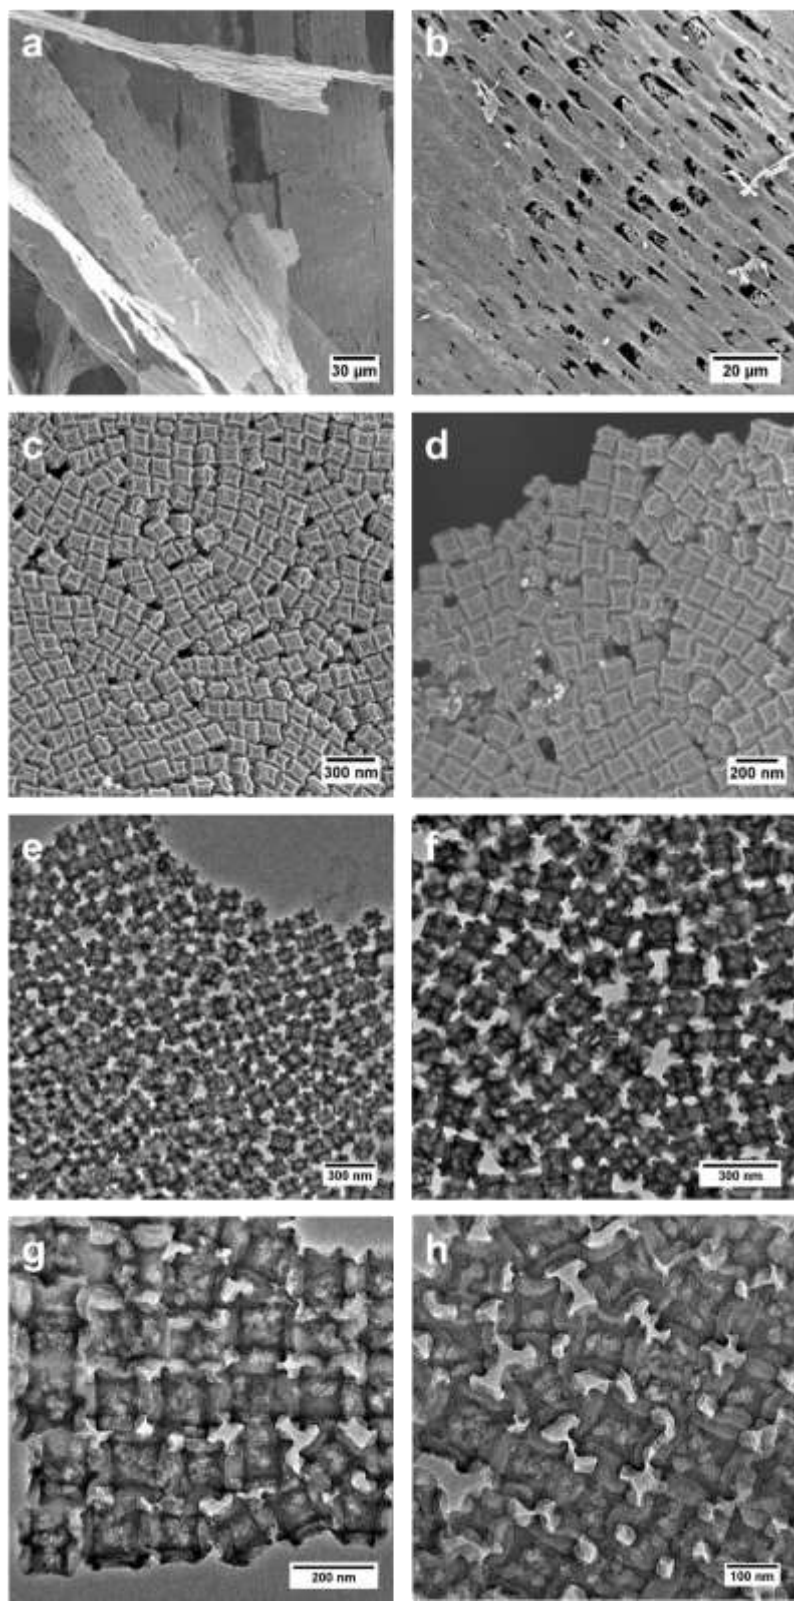

130

131 Fig. S4 (a-d) SEM and (e-h) TEM images of 2D Co/HCS-5.

132



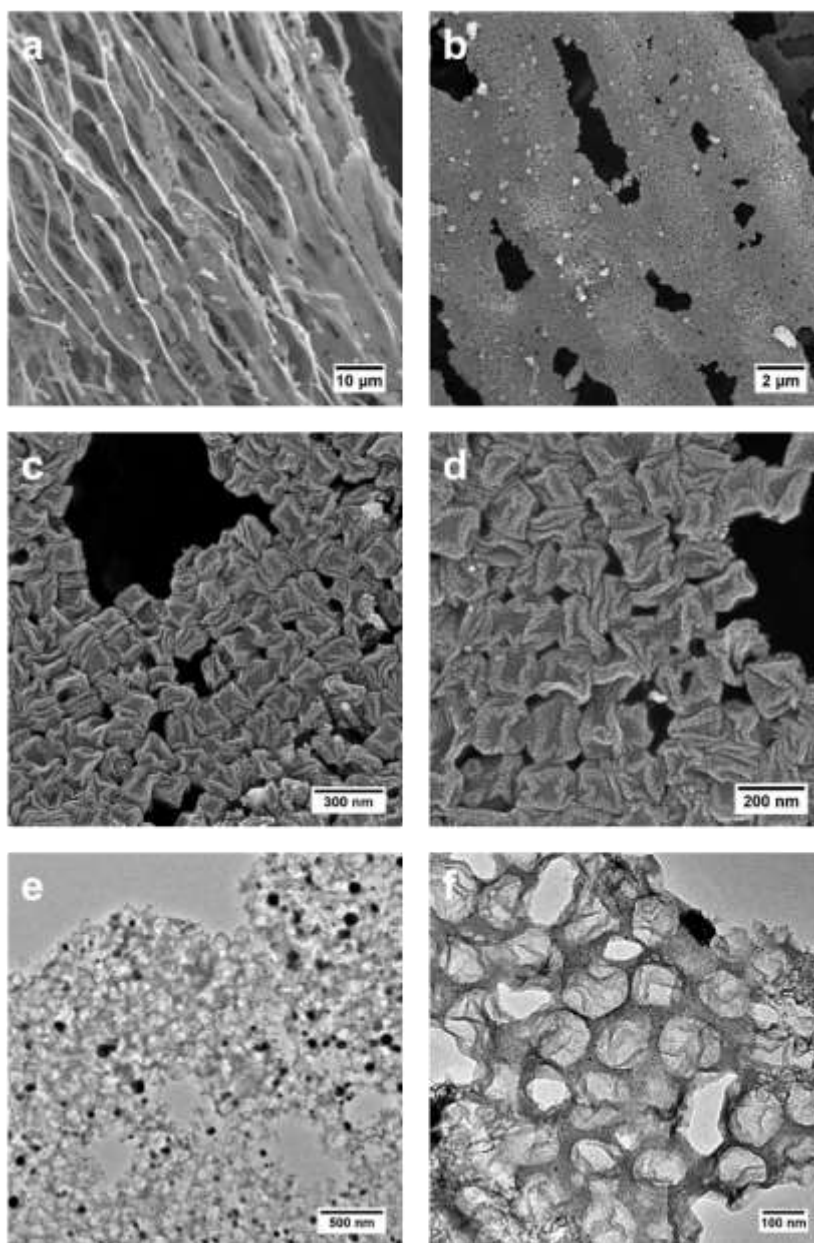

133

134 Fig. S5 (a-d) SEM and (e,f) TEM images of 2D Co/HCS-15.

135

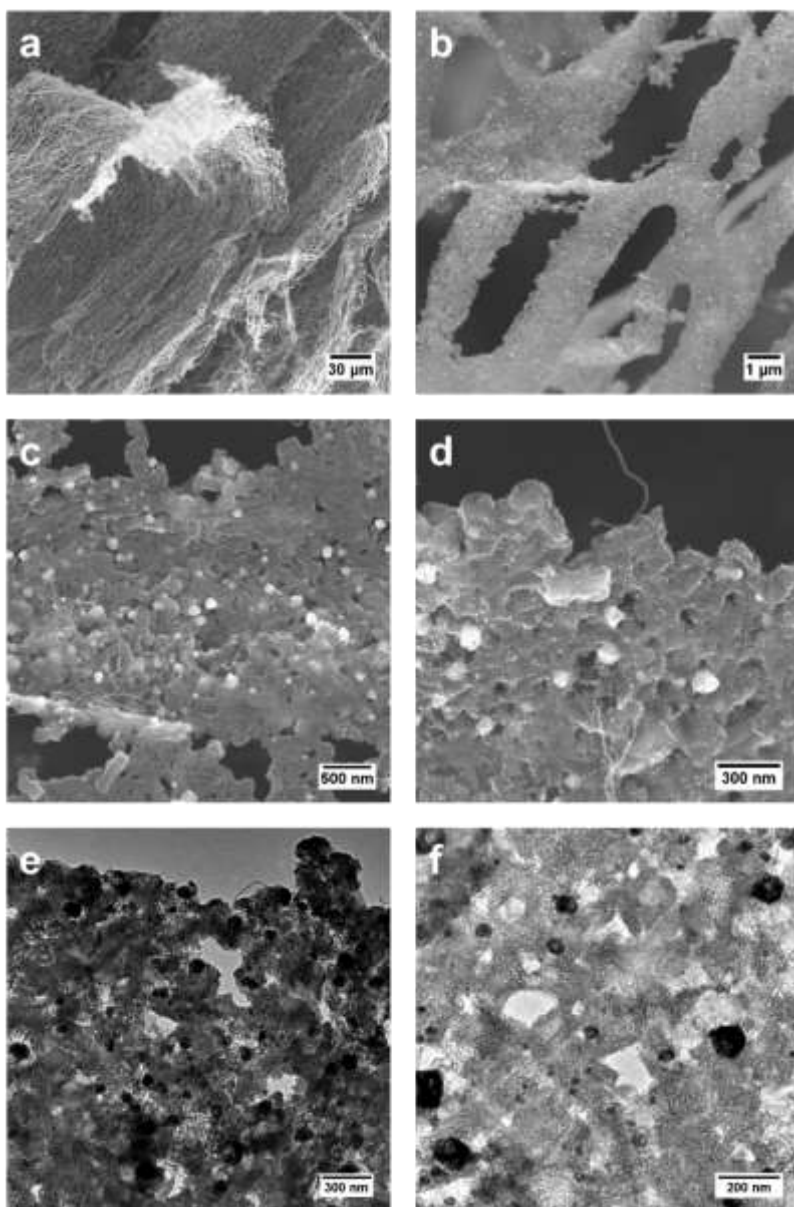

136

137 **Fig. S6** (a-d) SEM and (e,f) TEM images of 2D Co/HCS-30.

138

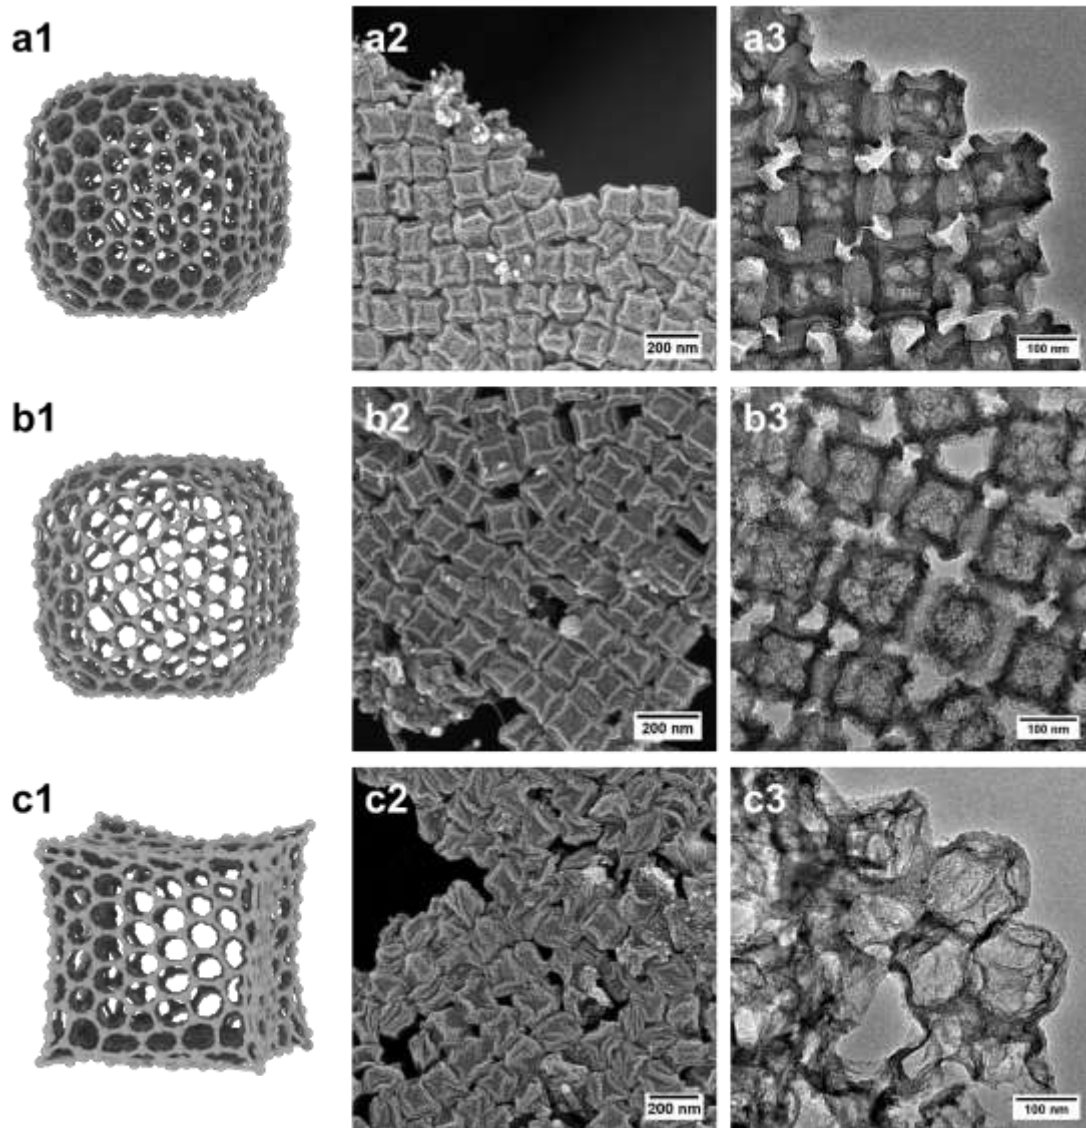

139

140 **Fig. S7** Structural comparison of Co/HCS-5, Co/HCS-10 and Co/HCS-15. Schematic illustration, SEM and TEM  
 141 images of (a) Co/HCS-5, (b) Co/HCS-10, and (c) Co/HCS-15.

142

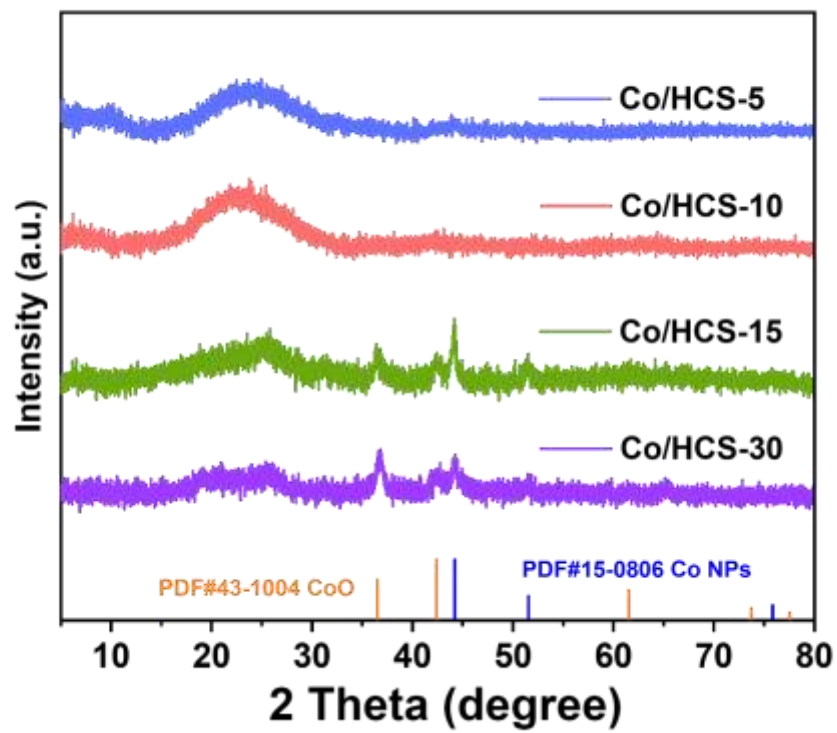

143

144 **Fig. S8** Powder X-ray diffraction (PXRD) patterns of Co/HCS-5, Co/HCS-10, Co/HCS-15, and Co/HCS-30.

145

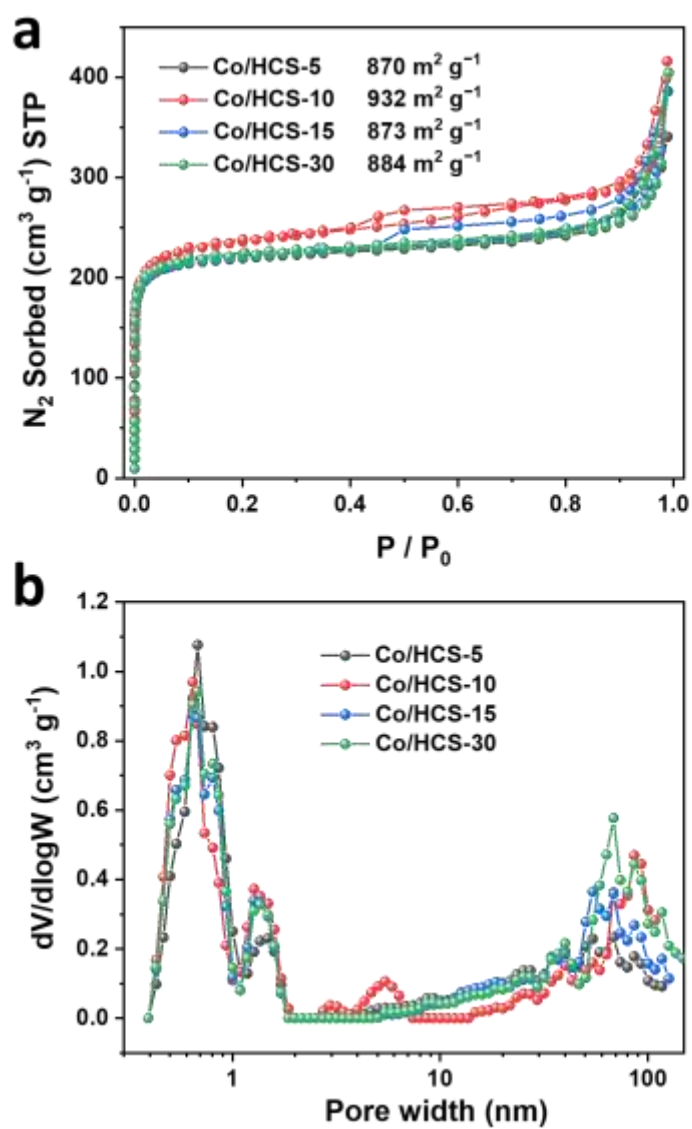

146

147 **Fig. S9** (a)  $\text{N}_2$  adsorption/desorption isotherms and (b) NLDFT pore size distribution plots of Co/HCS-5, Co/HCS-  
 148 10, Co/HCS-15, and Co/HCS-30.

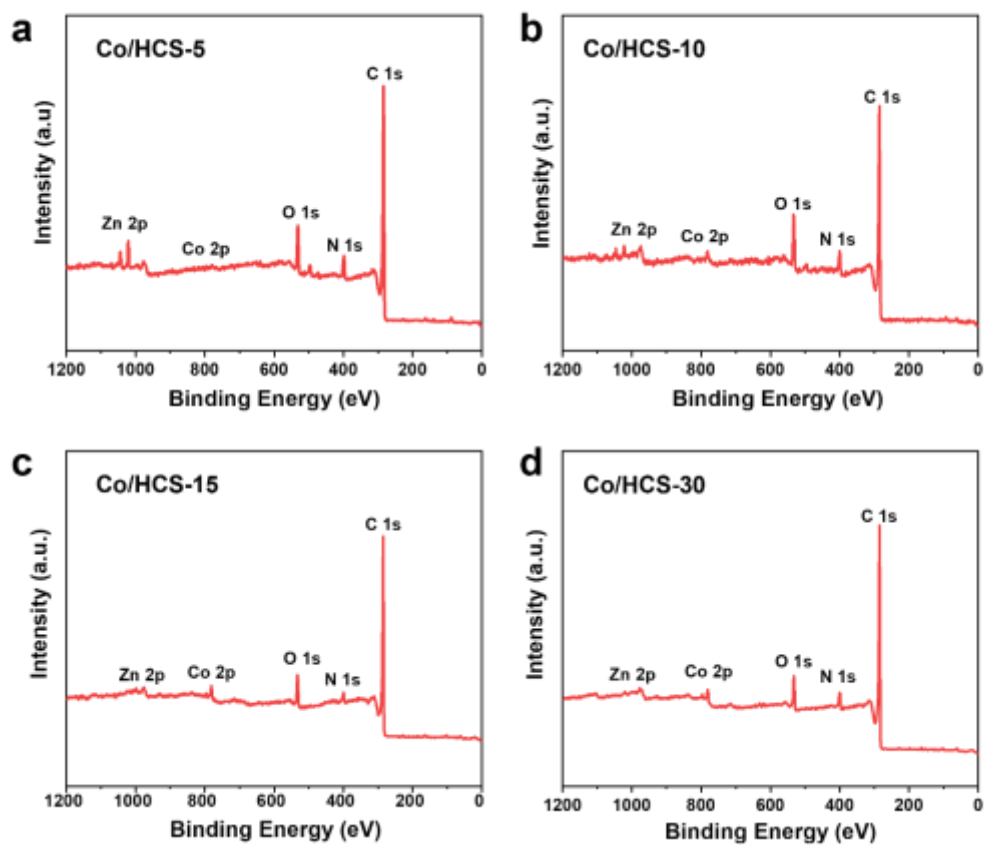

149

150 Fig. S10 XPS survey spectra of Co/HCS-5, Co/HCS-10, Co/HCS-15, and Co/HCS-30.

151

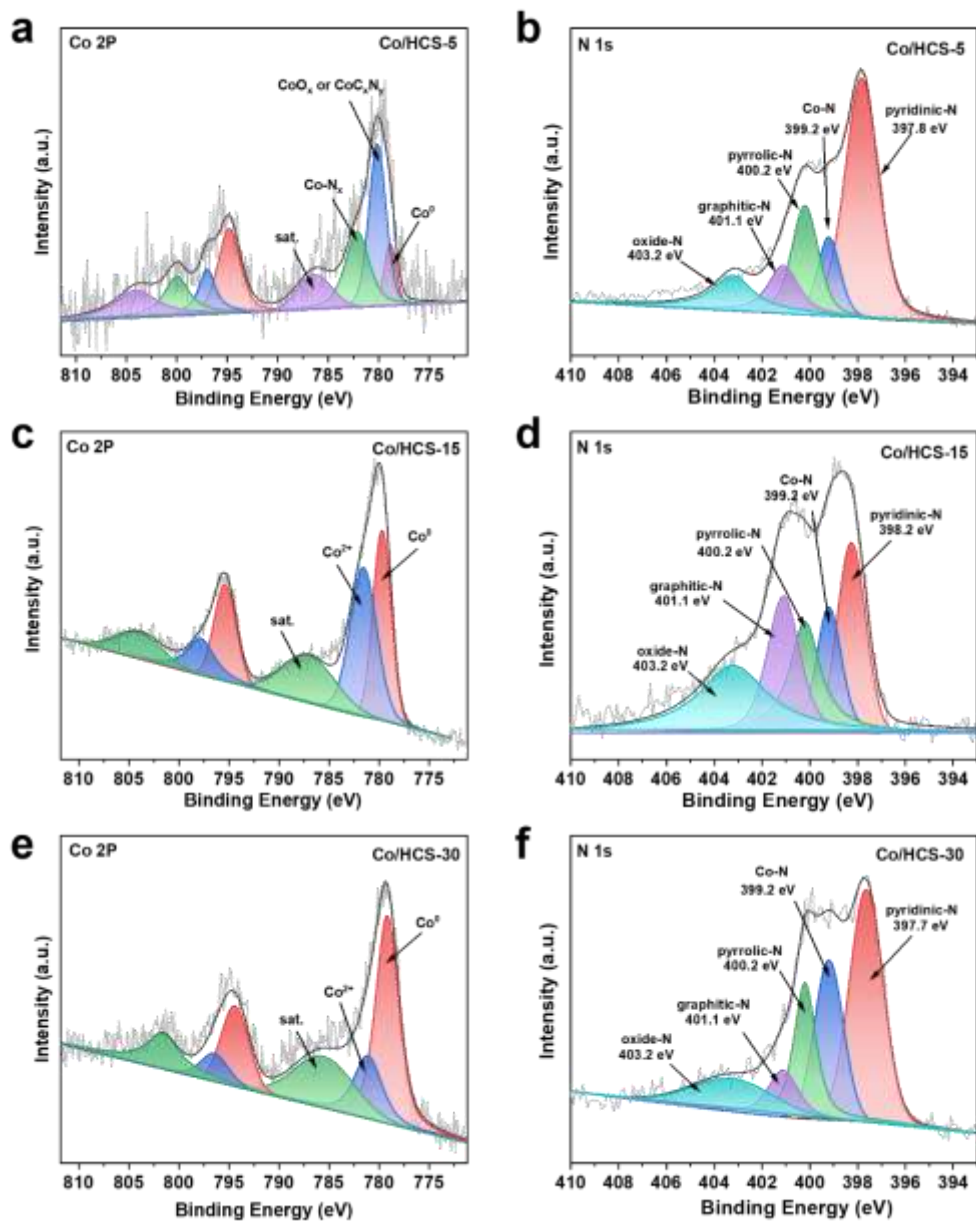

152

153 **Fig. S11** High-resolution deconvoluted Co 2p, and N 1s XPS spectra of (a,b) Co/HCS-5, (c,d) Co/HCS-15, and (e,f)

154 Co/HCS-30.

155

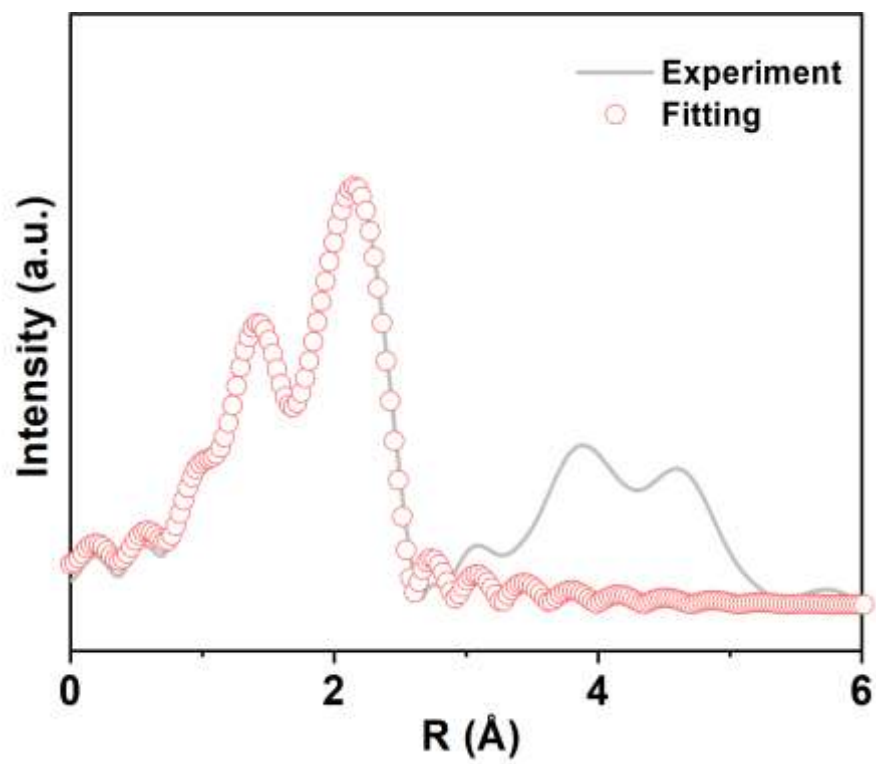

156

157 Fig. S12 The EXAFS fitting curves of Co/HCS-10.

158



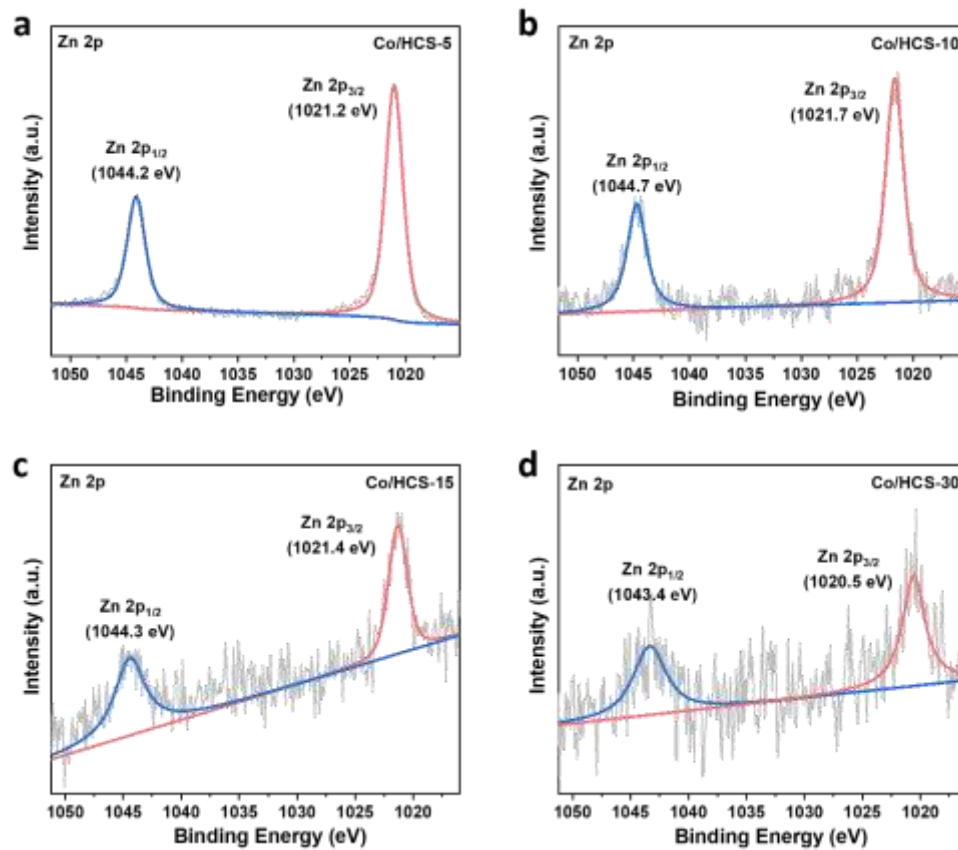

159

160

**Fig. S13** High-resolution deconvoluted Zn 2p XPS spectra of (a) Co/HCS-5, (b) Co/HCS-10, (c) Co/HCS-15, and (d) Co/HCS-30.

161

162

163

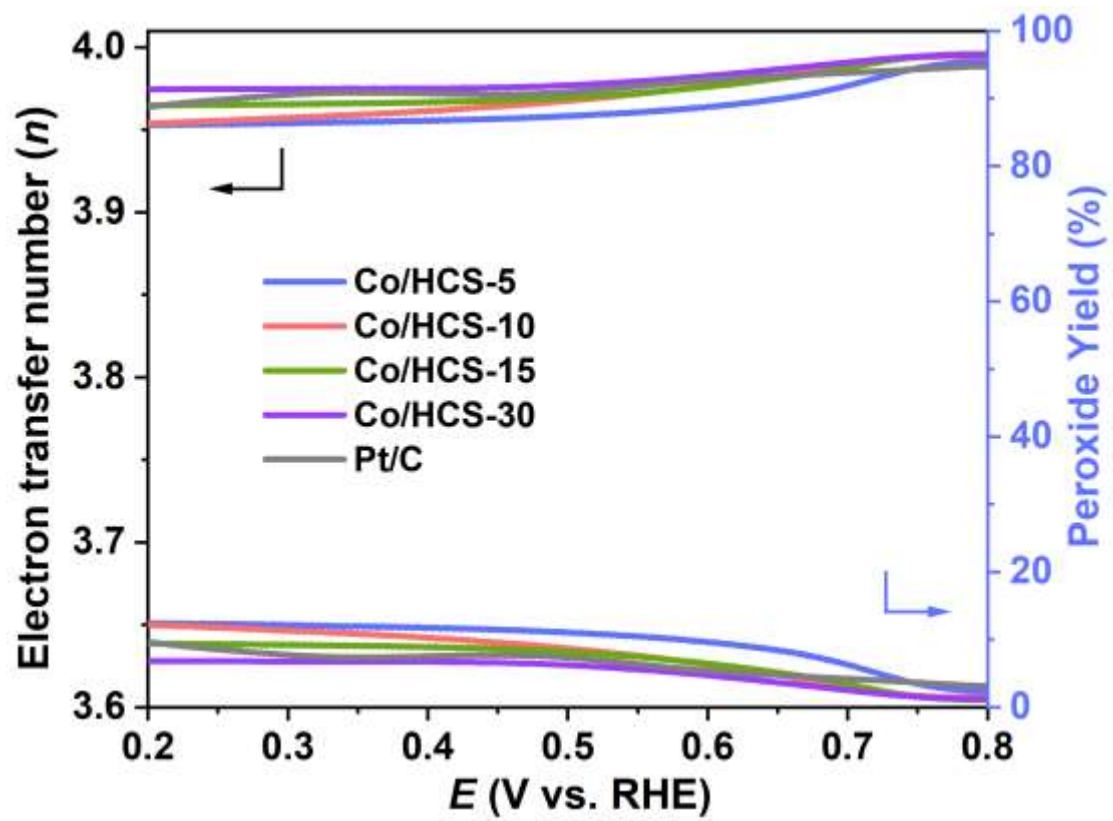

164  
 165  
 166  
 167

Fig. S14 The electron transfer number and H<sub>2</sub>O<sub>2</sub> yield plots.

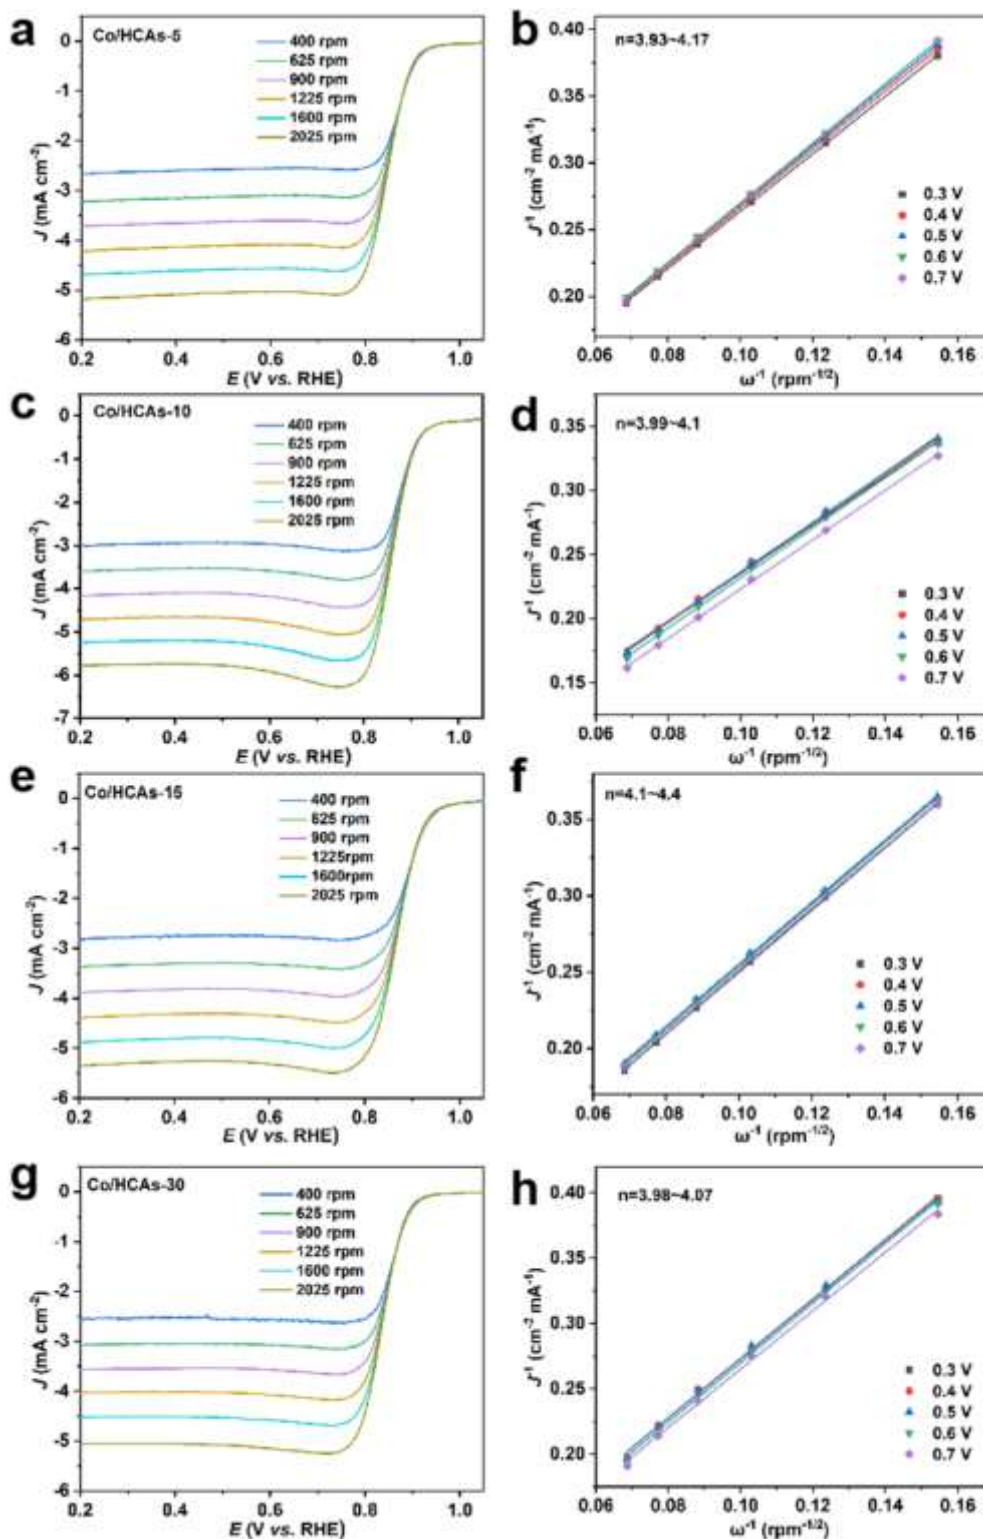

168

169 **Fig. S15** LSV curves at a scan rate of  $2 \text{ mV s}^{-1}$  in  $0.1 \text{ M KOH}$  with rotating speed from 400 to 2025 rpm. (a) ORR  
 170 polarization curves of Co/HCS-5, and (b) corresponding K-L plots. (c) ORR polarization curves of Co/HCS-10, and  
 171 (d) corresponding K-L plots. (e) ORR polarization curves of Co/HCS-15, and (f) corresponding K-L plots. (g) ORR  
 172 polarization curves of Co/HCS-30, and (h) corresponding K-L plots.

173

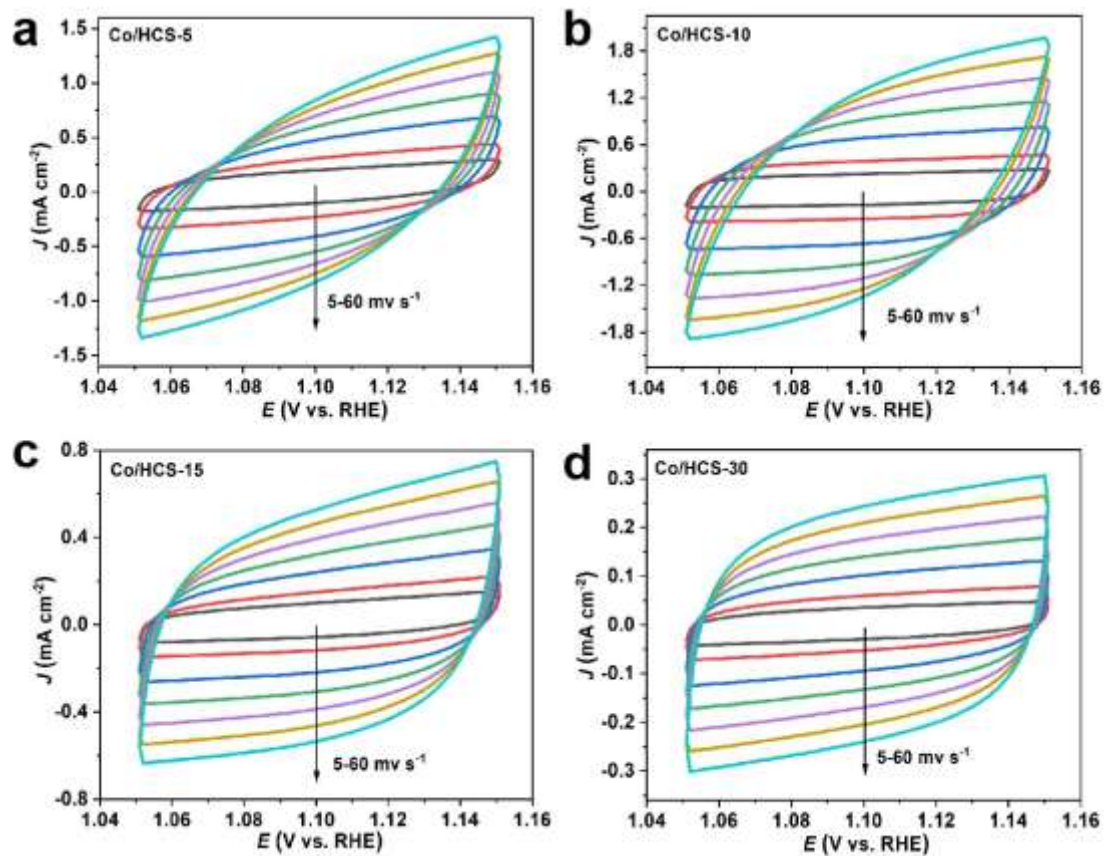

174

175 **Fig. S16** The cyclic voltammograms curves in the non-faradaic region at different scan rates: (a) Co/HCS-5, (b)

176 Co/HCS-10, (c) Co/HCS-15, (d) Co/HCS-30.

177

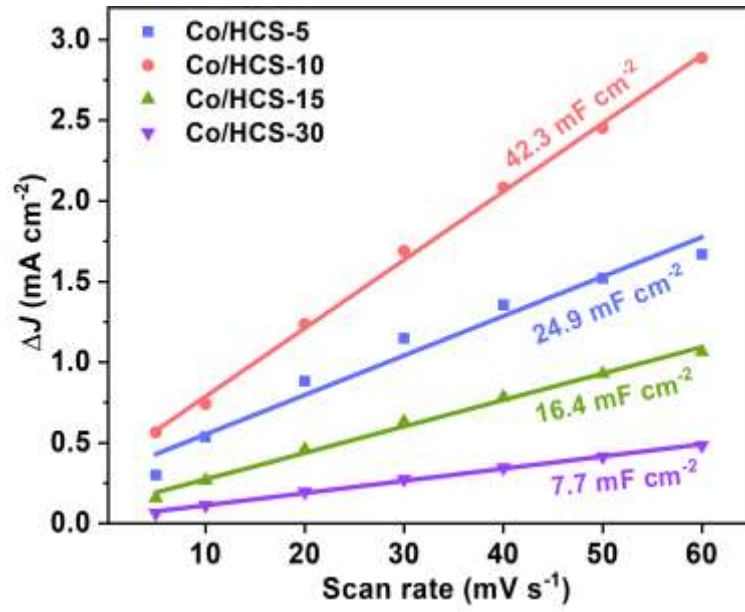

178

179 Fig. S17 Electrochemical double-layer capacitances ( $C_{dl}$ ) of Co/HCS-5, Co/HCS-10, Co/HCS-15, and Co/HCS-30.

180

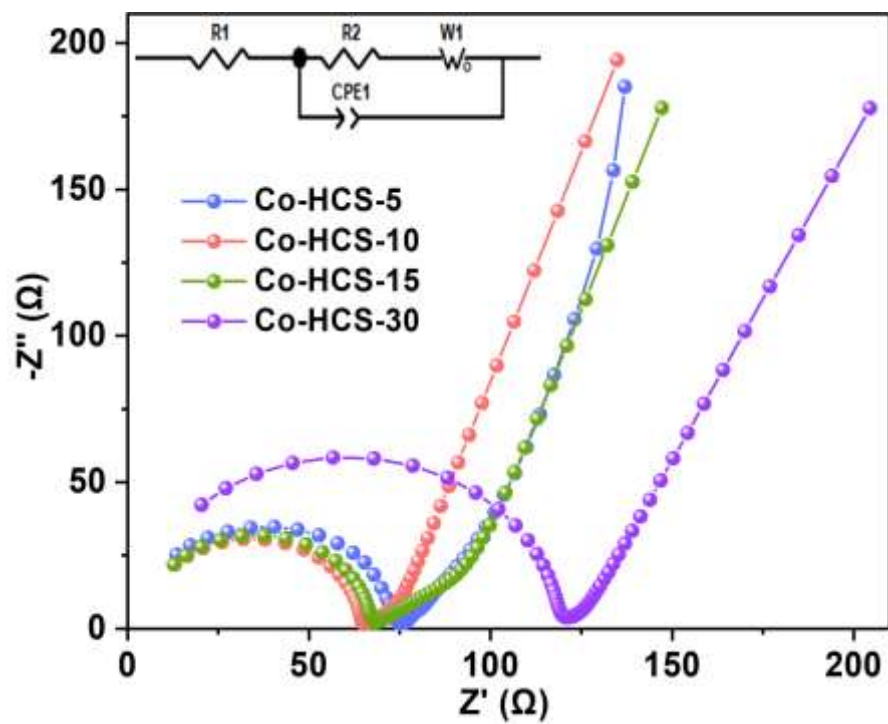

181

182 Fig. S18 EIS spectra at open circuit potential for Co/HCS-5, Co/HCS-10, Co/HCS-15, Co/HCS-30.

183

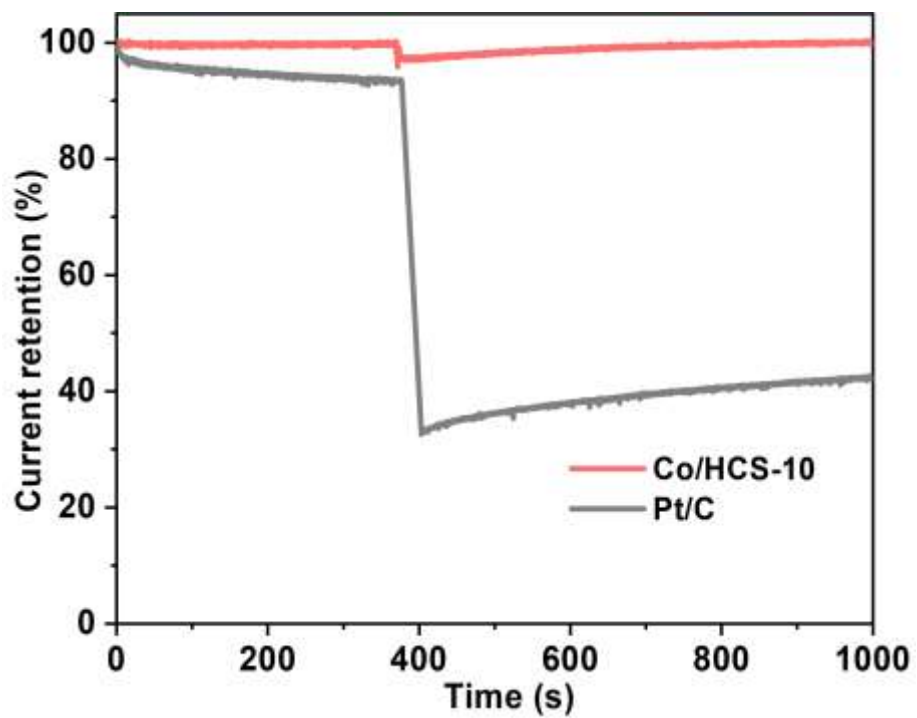

184

185 Fig. S19 Chronoamperometric responses of Co/HCS-10 and Pt/C before and after the addition of methanol.

186

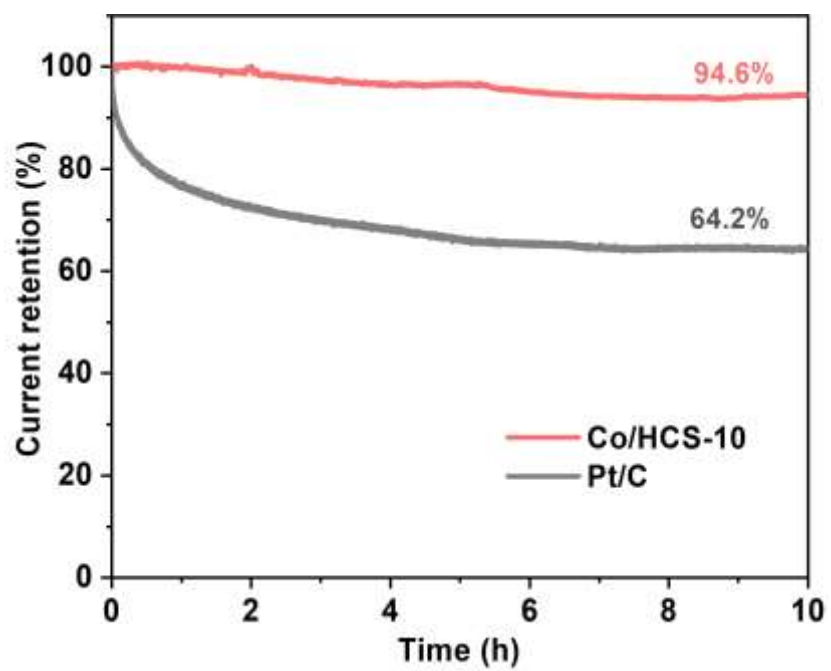

187

188 Fig. S20 Current retention from chronoamperometric curves of Co/HCS-10 and Pt/C.

189



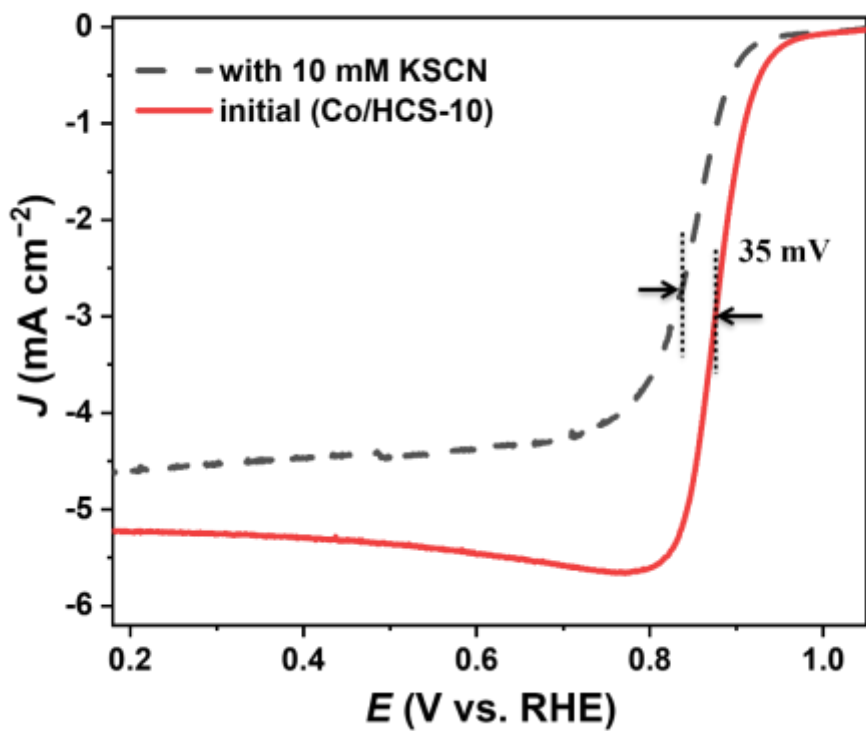

190

191 Fig. S21 ORR polarization curves of Co/HCS-10 before and after KSCN injection.

192

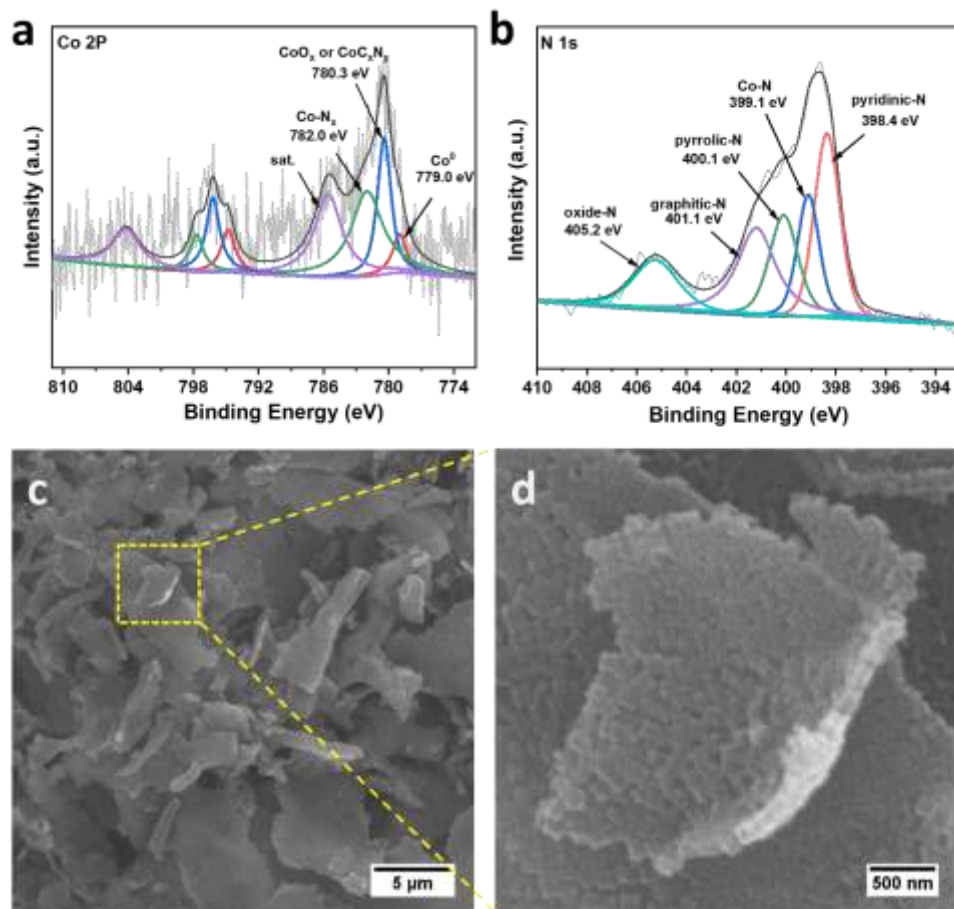

193

194 **Fig. S22** (a,b) High-resolution deconvoluted Co 2p and N 1s XPS spectra, and (c,d) SEM images of Co/HCS-10  
 195 after the stability test.

196 The 2D Co/HCS-10 catalyst is quite robust, because these superstructured carbon particles are closely connected  
 197 together. When we applied strong ultrasonication to prepare catalyst ink, the unique 2D superstructure remains  
 198 structurally stable after the stability testing. Additionally, XPS analysis of used Co/HCS-10 indicates no obvious  
 199 chemical state changes after stability test.

200

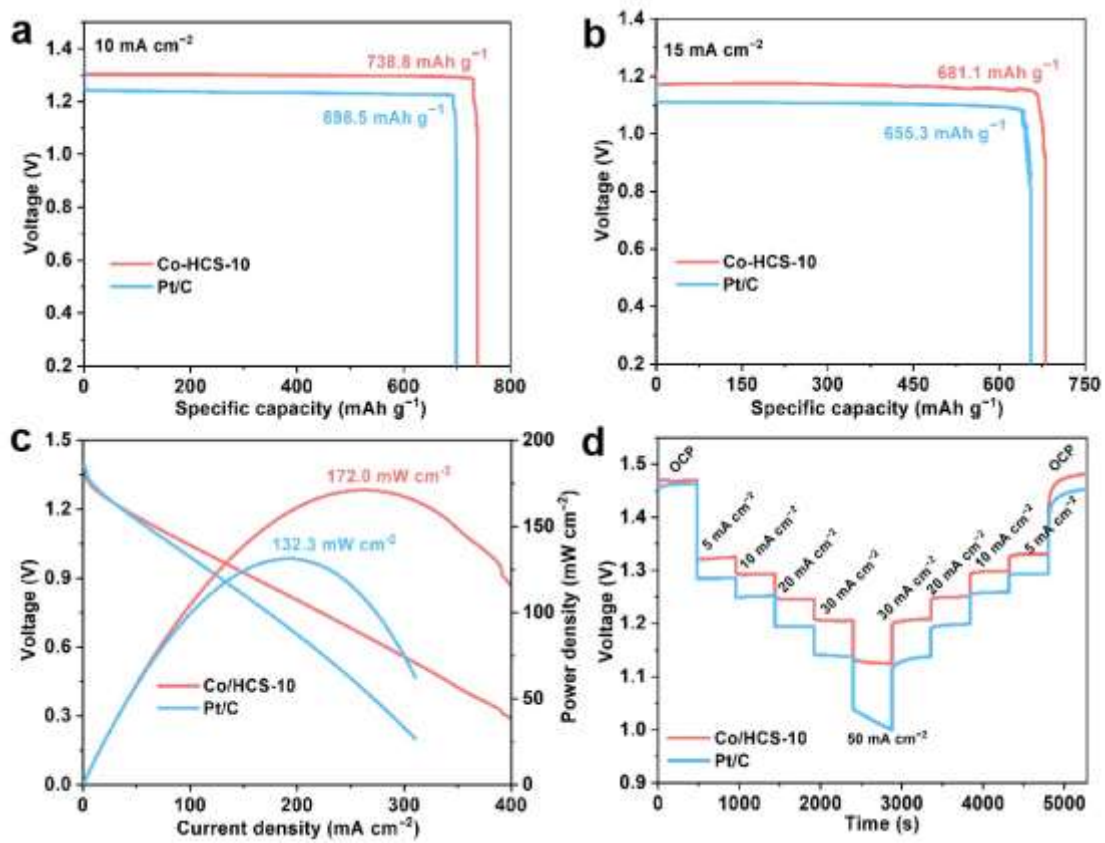

201

202 **Fig. S23** The liquid ZABs performance comparison between Co/HCS-10 and Pt/C catalysts. Galvanostatic discharge  
 203 curves at (a)  $10 \text{ mA cm}^{-2}$ , and (b)  $15 \text{ mA cm}^{-2}$ . (c) Discharging polarization and power density curves. (d)  
 204 Galvanostatic rate performance at various current densities.

205

206

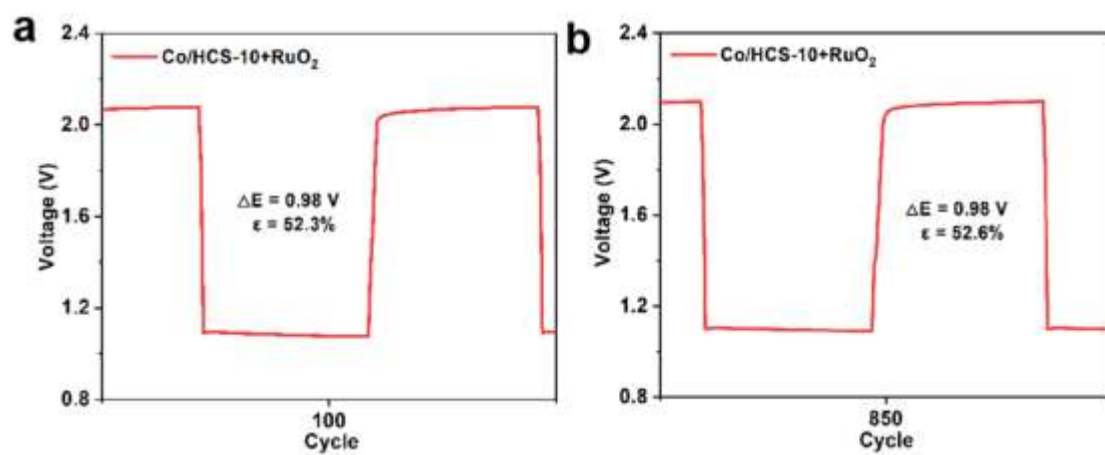

207

208 **Fig. S24** (a-b) The 100<sup>th</sup> and 850<sup>th</sup> discharge/charge cycle curves of the the liquid ZABs equipped with Co/HCS-  
 209 10+RuO<sub>2</sub> cathode (The charge and discharge plateau voltages used here are their average values).

210

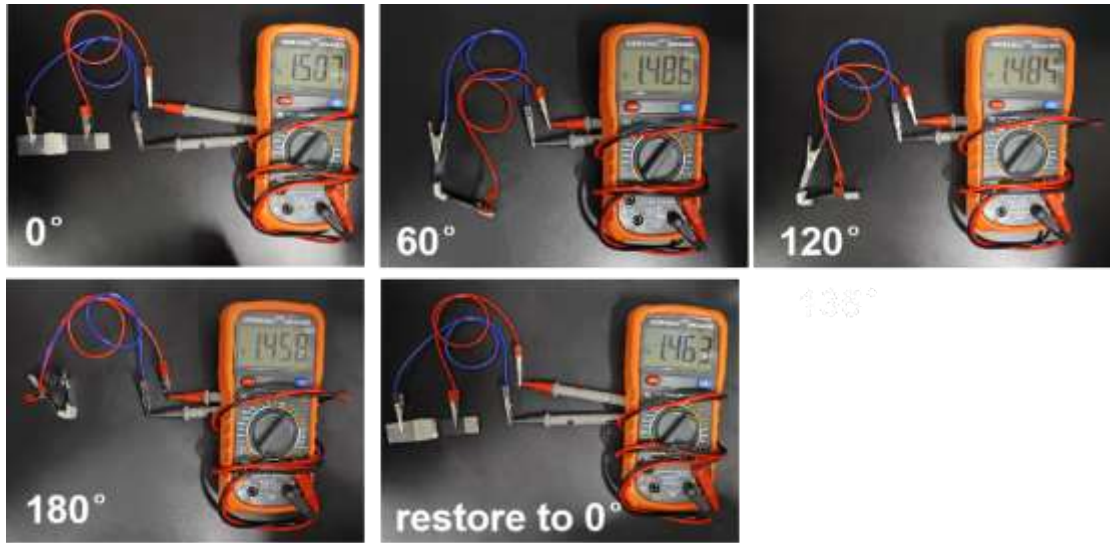

211

212 **Fig. S25** The open circuit voltage of the flexible ZABs equipped with Co/HCS-10 cathode under different bending  
 213 angles.

214

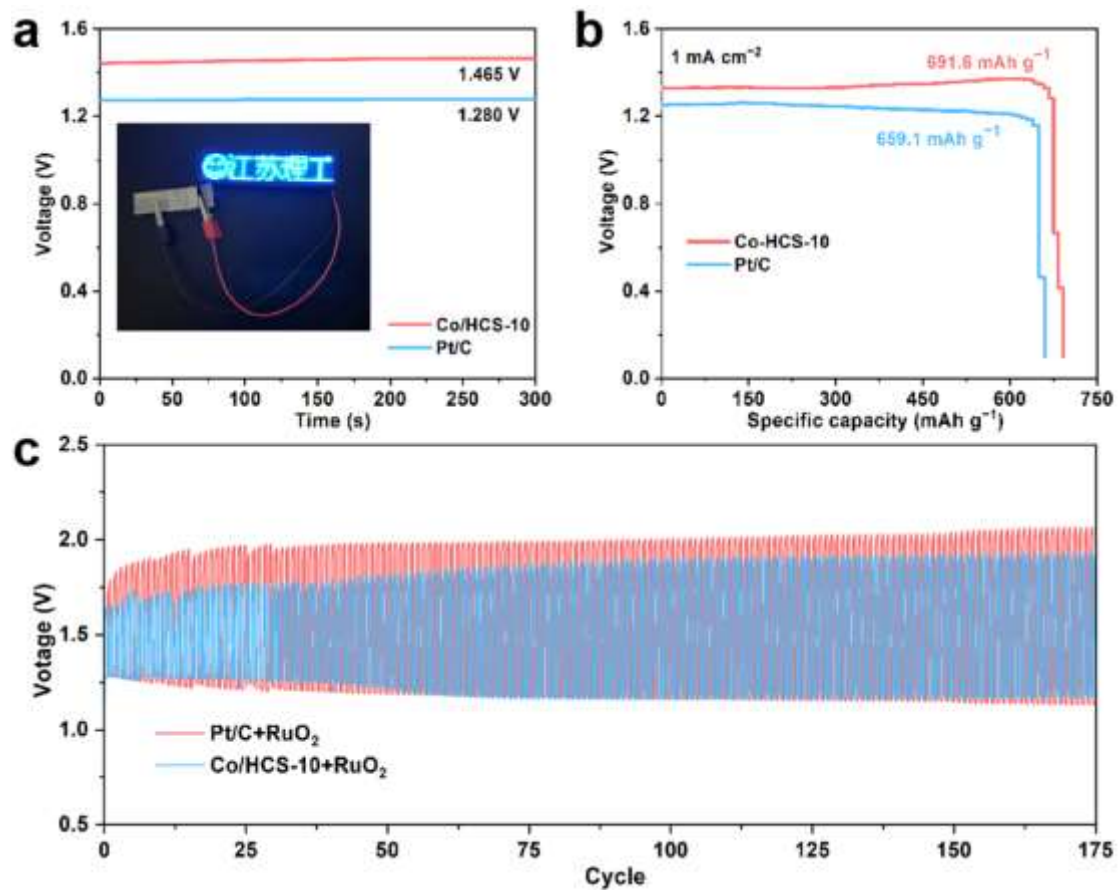

215

216 **Fig. S26** The flexible ZABs performance comparison between Co/HCS-10 and Pt/C catalysts. (a) The open circuit  
217 voltage plots. (d) The specific capacities at 1 mA cm<sup>-2</sup>. (c) The galvanostatic discharge/charge cycling stability.

218

219

220 **Table S1.** Elemental composition of Co/HCS-5, Co/HCS-10, Co/HCS-15, and Co/HCS-30 determined by XPS.

| Sample    | C(at%) | N(at%) | O(at%) | Co(at%) | Zn(at%) |
|-----------|--------|--------|--------|---------|---------|
| Co/HCS-5  | 81.21  | 7.94   | 9.48   | 0.36    | 1.01    |
| Co/HCS-10 | 80.64  | 7.58   | 10.22  | 0.97    | 0.59    |
| Co/HCS-15 | 86.45  | 4.28   | 8.24   | 0.85    | 0.18    |
| Co/HCS-30 | 87.45  | 5.4    | 6.09   | 0.83    | 0.23    |

221

222 **Table S2.** Structural parameters extracted from the Co K-edge EXAFS fitting of Co/HCS-10.

| sample    | shell | N   | R (Å) | $\sigma^2(10^{-3}\text{Å}^2)$ | $\Delta E_0$ (eV) | R factor |
|-----------|-------|-----|-------|-------------------------------|-------------------|----------|
| Co/HCS-10 | Co-N  | 3.2 | 1.95  | 9.4                           | -4.9              | 0.004    |

223 N, coordination numbers; R, the internal atomic distance;  $\sigma^2$ , the Debye-Waller factor;  $\Delta E_0$ , inner  
 224 potential correction to account for the difference in the inner potential between the sample and the  
 225 reference compound; R factor, indicates the goodness of the of the fitting.

226

227 **Table S3.** Comparison of liquid ZABs performance with other reported transition metal based electrocatalysts.

| Smample                                   | Open Voltage (V) | Peak power density ( $\text{mW cm}^{-2}$ ) | Ref                                                       |
|-------------------------------------------|------------------|--------------------------------------------|-----------------------------------------------------------|
| Co/HCS-10                                 | 1.486            | 172.0                                      | this work                                                 |
| RuCo/NPC (5:5)  RuCo/NPC (7:3)            | 1.45             | 79.4                                       | <i>Chem. Commun.</i> <b>2021</b> , 57,1498-1501           |
| CoCu/N-CNS                                | 1.424            | 104.3                                      | <i>Small</i> <b>2023</b> , 19, 2207413                    |
| Co-CoN <sub>4</sub> @NCNs                 | 1.47             | 131.6                                      | <i>Adv. Funct. Mater.</i> <b>2022</b> , 32, 2207331       |
| CoP <sub>3</sub> /CeO <sub>2</sub> /C     | 1.343            | 150.0                                      | <i>Appl. Catal. B: Environ.</i> <b>2023</b> , 321, 122029 |
| Pt@CoS <sub>2</sub> -NrGO                 | 1.41             | 114                                        | <i>Appl. Catal. B: Environ.</i> <b>2021</b> , 297, 120405 |
| Co SA/NCFs                                | 1.53             | 154.5                                      | <i>Nano Lett.</i> <b>2022</b> , 22, 2497–2505             |
| FeP/Fe <sub>2</sub> O <sub>3</sub> @ NPCA | 1.428            | 130.0                                      | <i>Adv. Mater.</i> <b>2020</b> , 2002292                  |
| Fe-P/Cu <sub>3</sub> P-NPC                | 1.39             | 158.5                                      | <i>Small</i> <b>2023</b> , 2301985                        |

228

229

230
